# Supplementary material for: Strong graphene oxide nanocomposites from aqueous hybrid liquid crystals
Source: PubMed Central journal article supplement (PMC7012915; doi:10.1038/s41467-020-14618-0), 2020-02-11
Supplement: 41467_2020_14618_MOESM3_ESM.pdf [file 41467_2020_14618_MOESM3_ESM.pdf]

## **Description of Additional Supplementary Files**

File Name: Supplementary Data 1

Description: The enhancement in modulus ( $\Delta E$ ) and tensile strength ( $\Delta\sigma$ ) for polymer+GO nanocomposite films.
