# Supplementary material for: Strong graphene oxide nanocomposites from aqueous hybrid liquid crystals
Source: PubMed Central journal article supplement (PMC7012915; doi:10.1038/s41467-020-14618-0), 2020-02-11
Supplement: 41467_2020_14618_MOESM4_ESM.pdf [file 41467_2020_14618_MOESM4_ESM.pdf]

# Supplementary Data 1 for

## Strong Graphene Oxide Nanocomposites from Aqueous Hybrid Liquid Crystals

Hegde et al

**Supplementary Data 1.** The enhancement in modulus ( $\Delta E$ ) and tensile strength ( $\Delta\sigma$ ) for polymer+GO nanocomposite films.<sup>a</sup>

| No.                       | Matrix                        | GO type <sup>a</sup> | Test <sup>b</sup> | GO <sup>c</sup><br>wt. % | E <sub>PM</sub><br>GPa | $\Delta E$<br>GPa | $\sigma_{PM}$<br>MPa | $\Delta\sigma^d$<br>MPa | Reference |
|---------------------------|-------------------------------|----------------------|-------------------|--------------------------|------------------------|-------------------|----------------------|-------------------------|-----------|
| <b>Aliphatic polymers</b> |                               |                      |                   |                          |                        |                   |                      |                         |           |
| 1                         | Polyethylene succinate        | GO                   | Tensile           | 0.5                      | 0.38                   | 0.03              | 38                   | 16                      | 1         |
| 2                         | HDPE/MAPE (90/10)             | GO                   | Tensile           | 0.3                      | 0.43                   | 0.15              | 11.6                 | 1.4                     | 2         |
| 3                         | Polypropylene (PP)            | rGO                  | Tensile           | 10                       | 0.98                   | 0.52              | NA                   | NA                      | 3         |
| 4                         | polyethylene oxide (PEO)      | GO                   | Tensile           | 0.5                      | 0.3                    | 2.9               | 38                   | 14                      | 4         |
| 5                         | Nafion                        | GO                   | Tensile           | 4.5                      | NA                     | NA                | 9.4                  | 70.07                   | 5         |
| 6                         | Poly (lactic acid) (PLLA)     | GOf                  | Tensile           | 1                        | 1                      | 0                 | 33                   | 42                      | 6         |
| 7                         | PLLA                          | GO                   | Tensile           | 1                        | 1                      | 0                 | 33                   | 17                      | 7         |
| 8                         | PLLA                          | GO                   | Tensile           | 2                        | 1.56                   | 0.93              | 41.4                 | 21.6                    | 2         |
| 9                         | Polycaprolactone (PCL)        | GO                   | Tensile           | 2                        | 0.21                   | 0.23              | 14.2                 | 13.3                    | 2         |
| 10                        | PCL                           | GO                   | Tensile           | 2                        | 0.25                   | 0.065             | NA                   | NA                      | 7         |
| 11                        | PCL                           | rGO                  | Tensile           | 2                        | 0.25                   | 0.165             | NA                   | NA                      | 7         |
| 12                        | chitosan-PVP                  | GO                   | Tensile           | 0.5                      | 2                      | 1.5               | 60                   | 60                      | 8         |
| 13                        | Polyester resin +MEKP hardner | rGO                  | Tensile           | 3                        | 1.6                    | 1.4               | 26                   | 32                      | 9         |
| 14                        | Polyester-Carbon fiber        | rGO                  | DMTA              | 10.3                     | 0.5                    | 0.5               | NA                   | NA                      | 10        |
| 15                        | Polyester-Carbon fiber        | rGO                  | Tensile           | 10.3                     | NA                     | NA                | 1.75                 | 0.65                    | 10        |
| 16                        | Polyester                     | GO                   | Tensile           | 3                        | 1.2                    | 0.5               | 35                   | 40                      | 9         |
| 17                        | Polyamide 6                   | TrGO                 | Tensile           | 10                       | 1.65                   | 0.78              | NA                   | NA                      | 3         |
| 18                        | Polycarbonate (PC)            | TrGO                 | Tensile           | 10                       | 1.48                   | 1.19              | NA                   | NA                      | 3         |
| 19                        | PC                            | rGO                  | Tensile           | 1                        | 1.9                    | 0.9               | 62                   | 26                      | 11        |
| 20                        | Linear PC                     | GOf                  | Tensile           | 3                        | 0.09                   | 0                 | NA                   | NA                      | 12        |
| 21                        | Branched PC                   | GOf                  | Tensile           | 0.5                      | 0.072                  | -0.012            | NA                   | NA                      | 12        |
| 22                        | PC                            | rGOf                 | Tensile           | 3                        | 1.9                    | 0.2               | 51                   | 3                       | 13        |
| 23                        | Polyvinyl alcohol (PVA)       | GO                   | Tensile           | 5.4                      | 2.9                    | 3                 | 33.00                | 29                      | 14        |
| 24                        | PVA                           | GO                   | Tensile           | 5.4                      | 2.5                    | 1.5               | 64.00                | 3                       | 14        |
| 25                        | PVA                           | GO                   | Tensile           | 0.5                      | 2.1                    | 1.2               | 41.5                 | 11.9                    | 15        |
| 26                        | PVA                           | GOf                  | Tensile           | 1.4                      | 0.16                   | 0.37              | 22.5                 | 23.2                    | 16        |

|    |                               |     |         |       |        |        |      |        |    |
|----|-------------------------------|-----|---------|-------|--------|--------|------|--------|----|
| 27 | PVA                           | GOf | Tensile | 0.525 | 2.75   | 1.35   | 90   | 50     | 17 |
| 28 | PVA                           | GO  | Tensile | 1     | 3.8    | 3.4    | 90   | 40     | 18 |
| 29 | PVA                           | GO  | Tensile | 5     | 2.1    | 4.0    | 63   | 22     | 19 |
| 30 | PVA                           | GO  | Tensile | 20    | -      | -      | 16   | 43.6   | 20 |
| 31 | PVA                           | rGO | Tensile | 1     | 4.1    | 1.4    | 97   | 41     | 21 |
| 32 | PVA                           | GO  | Tensile | 1     | 3.75   | 3.75   | 95   | 40     | 22 |
| 33 | PVA                           | rGO | Tensile | 0.3   | 2.32   | 0.23   | 25.3 | 13.7   | 23 |
| 34 | PVA                           | GO  | Tensile | 0.3   | 2.32   | 3.5    | 25.3 | 37.7   | 22 |
| 35 | PVA                           | GO  | Tensile | 0.5   | 0.45   | 0.03   | 22   | 3      | 24 |
| 36 | PVA                           | rGO | Tensile | 4.97  | 0.1    | 1      | 15   | 28     | 25 |
| 37 | chitosan-PVA                  | GO  | Tensile | 6     | 1.83   | 3.95   | 52   | 13     | 26 |
| 38 | Polymethylmethacrylate (PMMA) | GOf | Tensile | 1     | 0.0187 | 0.0031 | 35.5 | 6.5    | 27 |
| 39 | PMMA                          | GO  | Tensile | 1     | 0.0187 | 0      | 35.5 | -2.8   | 26 |
| 40 | PMMA                          | GOf | Tensile | 1     | 1.2    | 0.75   | 34   | 16     | 28 |
| 41 | PMMA-HA bone cement           | GO  | DMTA    | 0.5   | 2.67   | 0.48   | NA   | NA     | 26 |
| 42 | PMMA                          | GO  | DMTA    | 1     | 2.5    | 0.5    | NA   | NA     | 29 |
| 43 | PMMA                          | GO  | Tensile | 1     | 2.1    | 0.8    | 76.5 | 16.065 | 28 |
| 44 | PMMA-PEO                      | GO  | DMTA    | 6.7   | 0.52   | 0.619  | NA   | NA     | 30 |

### Semi-aromatic polymers

|    |                           |     |         |       |       |       |       |      |    |
|----|---------------------------|-----|---------|-------|-------|-------|-------|------|----|
| 45 | Polystyrene               | GO  | Tensile | 2     | 1.83  | 1.75  | 23    | 20.5 | 2  |
| 46 | Polyurethane/Epoxy        | GO  | Tensile | 0.033 | 0.218 | 0.079 | 17.2  | 2.2  | 31 |
| 47 | Epoxy                     | GOf | Tensile | 0.5   | 3.15  | 0.45  | 52.9  | 12.0 | 32 |
| 48 | Epoxy                     | GO  | Tensile | 0.5   | 3.15  | 0.52  | 52.9  | 32.5 | 32 |
| 49 | Epxoy                     | GOf | DMTA    | 0.5   | 1.841 | 0.22  | NA    | NA   | 32 |
| 50 | Epxoy                     | GOf | Tensile | 0.2   | 2.5   | 0.8   | 69    | 12   | 33 |
| 51 | Epxoy                     | GOf | DMTA    | 0.4   | 1.5   | 1.7   | NA    | NA   | 34 |
| 52 | Epxoy                     | GOf | Tensile | 1     | 2.8   | 0.8   | 140   | 30   | 35 |
| 53 | Polyethyleneterephthalate | GO  | DMTA    | 7     | 2.2   | 1.2   | NA    | NA   | 36 |
| 54 | PI (P84)                  | GOf | Tensile | 0.2   | 2.03  | 0.71  | 77.40 | 20.6 | 28 |

### Aromatic Polymers

|    |                              |     |         |      |      |      |        |      |    |
|----|------------------------------|-----|---------|------|------|------|--------|------|----|
| 55 | Polyimide (PI) (sBPADA-BAPP) | GOf | DMTA    | 4    | 1    | 1.25 | NA     | NA   | 37 |
| 56 | PI (BTDA-ODA-PA)             | GOf | Tensile | 0.75 | 1.81 | 1.12 | 128.00 | 76   | 38 |
| 57 | PI (PMDA-ODA)                | GOf | Tensile | 0.3  | 2.3  | 0.8  | 86.00  | 22   | 39 |
| 58 | PI (PMDA-ODA)                | rGO | Tensile | 0.3  | 2.3  | 0.05 | NA     | NA   | 41 |
| 59 | PI (PMDA-ODA)                | rGO | Tensile | 2    | 2.5  | 3.1  | 75.70  | -8.7 | 40 |
| 60 | PI (PMDA-ODA)                | GOf | Tensile | 2    | 2.5  | 7.1  | 75.70  | 22.3 | 42 |

|    |                           |      |         |      |       |       |        |      |    |
|----|---------------------------|------|---------|------|-------|-------|--------|------|----|
| 71 | PI (PMDA-ODA)             | rGOf | Tensile | 0.75 | 1.8   | 0.6   | 122.00 | 5    | 41 |
| 72 | PI (PMDA-ODA)             | GO   | Tensile | 1    | 1.347 | 0.333 | 87.00  | 4    | 42 |
| 73 | PI (PMDA-ODA)             | GO   | Tensile | 1    | 2.215 | 0.455 | 73.80  | 6.2  | 44 |
| 74 | PI (PMDA-ODA)             | rGO  | Tensile | 0.5  | 1.8   | 0.2   | 88.00  | 32   | 43 |
| 75 | PI (PMDA-ODA)             | GO   | Tensile | 0.5  | 1.8   | 0.2   | 88.00  | 4    | 45 |
| 76 | Polybenzimidazole         | GO   | Tensile | 1    | 3.2   | 0.75  | 145    | 26   | 44 |
| 77 | Poly ether ether ketone   | GOf  | Tensile | 3    | 2.2   | 0.9   | 100    | 5    | 45 |
| 78 | Polyarylene ether nitrile | GOf  | DMTA    | 0.75 | 1.95  | 1.31  | NA     | NA   | 46 |
| 79 | Polyarylene ether nitrile | GOf  | Tensile | 0.75 | 3.26  | 0.61  | 105.3  | 14.7 | 50 |
| 80 | Polyethersulfone (PES)    | GO   | Tensile | 1    | 1.16  | 0.79  | 31     | 25   | 47 |
| 81 | PES                       | GO   | Tensile | 1.3  | 0.15  | 0.052 | NA     | NA   | 48 |
| 82 | PES                       | GO   | Tensile | 1    | 0.187 | 0.031 | 3.4    | 0.44 | 49 |

<sup>a</sup> GO = graphene oxide, rGO = reduced GO, GOf = functionalized GO.

<sup>b</sup> Tensile = stress strain tests, DMTA = dynamic mechanical thermal analysis; the storage modulus (E') at 30 °C is considered for calculating enhancement.

<sup>c</sup> When GO is reported in vol.%, conversion to wt.% was performed using polymer and GO densities of 1.3 and 2.0 g/cm<sup>3</sup> respectively.

<sup>d</sup> Reported tensile strength for nanocomposites is the maximum tensile value reported when maximum enhancement in Young's modulus is attained.

### Supplementary data file references:

- 1 Zhao, J., Wang, X., Zhou, W., Zhi, E., Zhang, W., Ji, J. Graphene-reinforced biodegradable poly(ethylene succinate) nanocomposites prepared by in situ polymerization. *J. App. Poly.Sci.* **130**, 3212-3220 (2013).
- 2 Wan, C., Chen, B. Reinforcement and interphase of polymer/graphene oxide nanocomposites. *J. Mater. Chem.* **22**, 3637-3646 (2012).
- 3 Sturer, P., Wissert, R., Thomann, R., Mulhaupt, R. Functionalized Graphenes and Thermoplastic Nanocomposites Based upon Expanded Graphite Oxide. *Macromol. Rapid Commun.* **30**, 316-327 (2009).
- 4 Cao, Y-C. *et al.* A poly (ethylene oxide)/graphene oxide electrolyte membrane for low temperature polymer fuel cells. *J. Power Sources* **196**, 8377-8382 (2011).
- 5 Lee, D. C., Yang, H. N., Park, S. H., Kim, W. J. Nafion/ graphene oxide composite membranes for low humidifying polymer electrolyte membrane fuel cell. *J. Membr. Sci.* **452**, 20-28 (2014).
- 6 Li, W. *et al.* A facile method to produce graphene oxide-g-poly (L-lactic acid) as a promising reinforcement for PLLA nanocomposites. *Chem. Engg. J.* **237**, 291-299 (2014).
- 7 Cai, D., Song, M. A simple route to enhance the interface between graphite oxide nanoplatelets and a semi-crystalline polymer for stress transfer. *Nanotech.* **20**, 315708/1- 315708/6 (2009).
- 8 Achaby, M. E. *et al.* Graphene oxide reinforced chitosan/polyvinylpyrrolidone polymer bio-nanocomposites. *J. Appl. Poly. Sci.* **131**, 41042/1-41042/11 (2014).

- 9 Bora, C., Bharali, P., Baglari, S., Dolui, S. K., Konwar, B. K. Strong and conductive reduced graphene oxide/polyester resin composite films with improved mechanical strength, thermal stability and its antibacterial activity. *Compos. Sci. Tech.* **87**, 1-7 (2013).
- 10 Tang Z. *et al.* Incorporation of graphene into polyester/carbon nanofibers composites for better multi-stimuli responsive shape memory performances. *Carbon* **64**, 487-498 (2013).
- 11 Wang J. *et al.* Polycarbonate toughening with reduced graphene oxide: toward high toughness, strength and notch resistance. *Chem. Engg. J.* **325**, 474-484 (2017).
- 12 Lee, B. Y., Park, J. Y., Kim, Y. C. Effect of polycarbonate structure and reduction time on graphene oxide dispersion. *Poly. Adv. Tech.* **26**, 1241-1246 (2015).
- 13 Shen, B., Zhai, W., Tao, M., Lu, D., Zheng, W. Enhanced interfacial interaction between polycarbonate and thermally reduced graphene induced by melt blending. *Compos. Sci. Tech.* **86**, 109-116 (2013).
- 14 Sellam, C. *et al.* High mechanical reinforcing efficiency of layered poly (vinyl alcohol) – graphene oxide nanocomposites. *Nanocomp.* **1**, 89-95 (2015).
- 15 Hwang, S-H., Kang, D., Ruoff, R. S., Shin, H. S., Park, Y-B. Poly (vinyl alcohol) reinforced and toughened with poly(dopamine) treated graphene oxide, and its use for humidity sensing. *ACS Nano* **7**, 6739-6747 (2014).
- 16 Cheng, H. K. *et al.* Poly (vinyl alcohol) nanocomposites filled with poly (vinyl alcohol)-grafted graphene oxide. *ACS Appl. Mater. Inter.* **4**, 2387-2394 (2012).
- 17 Cano M. *et al.* Improving the mechanical properties of graphene oxide based materials by covalent attachment of polymer chains. *Carbon* **52**, 363-371 (2013).
- 18 Morimune, S., Nishino, T., Goto, T. Graphene oxide reinforced PVA nanocomposites. 18th International Conference on composite materials, 2011.
- 19 Xu, Y., Hong, W., Bai, H., Li, C., Shi, G. Strong and ductile poly (vinyl alcohol)/graphene oxide composite films with a layered structure. *Carbon* **47**, 3538-3543 (2009).
- 20 Cheng-an T. *et al.* Mechanical properties of graphene oxide/ polyvinyl alcohol composite film. *Polym. Polym. Compos.*, **25**, 11-16 (2017).
- 21 Zhou, T. *et al.* The preparation of high performance and conductive poly (vinyl alcohol)/graphene nanocomposite via reducing graphite oxide with sodium hydrosulfite. *Compos. Sci. Tech.* **71**, 1266-1270 (2011).
- 22 Morimune, S., Nishino, T., Goto, T. Poly (vinyl alcohol)/graphene oxide nanocomposites prepared by a simple eco-process. *Polym. J.* **44**, 1056-1063 (2012).
- 23 Kashyap, S., Pratihari, S. K., Behera, S. K. Strong and ductile graphene oxide reinforced PVA nanocomposites. *J. Alloys Comp.* **684**, 254-260 (2016).
- 24 Yang, X., Li, L., Shang, S., Tao, X-M. Synthesis and characterization of layer-aligned poly (vinyl alcohol)/graphene nanocomposites. *Polymer* **51**, 3431-3435 (2010).
- 25 Zhao, X., Zhang, Q., Chen, D. Enhanced Mechanical Properties of Graphene-Based Poly (vinyl alcohol) Composites. *Macromolecules*, **43**, 23578-2363 (2010).
- 26 Pandele A. M. *et al.* Synthesis, characterization, and in vitro studies of graphene oxide/chitosan–polyvinyl alcohol films. *Carbohydr. Polym.*, **102**, 813-820 (2014).

- 27 Goncalves, G. Graphene oxide modified with PMMA via ATRP as a reinforcement filler. *J. Mater. Chem.*, **20**, 9927-9934 (2010).
- 28 Wang, Y., Shi, Z., Yin, J. Kevlar oligomer functionalized graphene for polymer composites. *Polymer* **52**, 3661-3670 (2011).
- 29 Valles, C., Kinloch, I. A., Young, R. J., Wilson, N. R., Rourke, J. P. Graphene oxide and base-washed graphene oxide as reinforcements in PMMA nanocomposites. *Compos. Sci.Tech.* **88**, 158-164 (2013).
- 30 Jang, J. Y., Kim, M. S., Jeong, H. M., Shin, C. M. Graphite oxide/poly (methyl methacrylate) nanocomposites prepared by a novel method utilizing macroazoinitiator. *Compos. Sci.Tech.* **69**, 186-191 (2009).
- 31 Li, Y. *et al.* In situ polymerization and mechanical, thermal properties of polyurethane/graphene oxide/epoxy nanocomposites. *Mater. & Design* **47**, 850-856 (2013).
- 32 Y-J. Wan *et al.* Lai, Grafting of epoxy chains onto graphene oxide for epoxy composites with improved mechanical and thermal properties. *Carbon* **69**, 467-480 (2014).
- 33 Li, Z. *et al.* Control of the functionality of graphene oxide for its application in epoxy nanocomposites. *Polymer* **54**, 6437-6446 (2013).
- 34 Bao C. *et al.* In situ preparation of functionalized graphene oxide/epoxy nanocomposites with effective reinforcements. *J. Mater. Chem.* **21**, 13290-13298 (2011).
- 35 Gudarzi, M. M., Sharif, F. Enhancement of dispersion and bonding of graphene-polymer through wet transfer of functionalized graphene oxide. *eXpress Polym. Lett.* **6**, 1017-1031 (2012).
- 36 Li, M., Jeong, Y. G. Poly (ethylene terephthalate)/exfoliated graphite nanocomposites with improved thermal stability, mechanical and electrical properties. *Composites Part A; Appl. Sci. Manuf.* **42**, 560-566 (2011).
- 37 Yoonessi, M. *et al.* Graphene polyimide nanocomposites; thermal, mechanical, and high-temperature shape memory effects. *ACS Nano* **6**, 7644-7655 (2012).
- 38 Zhang L-B. *et al.* Preparation, mechanical and thermal properties of functionalized graphene/polyimide nanocomposites. *Compos. Part A: Appl. Sci. Manuf.* **43**, 1537-45 (2012).
- 39 Cao, L., Sun, Q., Wang, H., Zhang, X., Shi, H. Enhanced stress transfer and thermal properties of polyimide composites with covalent functionalized reduced graphene oxide. *Compos. Part A: Appl. Sci. Manuf.* **68**, 140-48 (2015).
- 40 Park O-K. *et al.* Synthesis and properties of iodo functionalized graphene oxide/polyimide nanocomposites. *Compos. Part B: Engg.* **56**, 365-371 (2014).
- 41 Luong, N. D. *et al.* Enhanced mechanical and electrical properties of polyimide film by graphene sheets via in situ polymerization. *Polymer* **52**, 5237-5242 (2011).
- 42 Kong, J- Y. Preparation and properties of polyimide/graphene oxide nanocomposite films with Mg ion crosslinker. *Euro. Poly. J.* **48**, 1394-1405 (2012).
- 43 Chen, M. *et al.* Dielectric and mechanical properties and thermal stability of polyimide-graphene oxide composite films. *Thin solid films* **584**, 232-237 (2015).
- 44 Wang, Y., Shi, Z., Fang, J. Xu, H., Yin, J. Graphene oxide/polybenzimidazole composites fabricated by a solvent-exchange method. *Carbon* **49**, 1199-1207 (2011).

- 45 Yang, L. *et al.* Design and preparation of graphene/poly(ether ether ketone) composites with excellent electrical conductivity. *J. Mater. Sci.* **49**, 2372-2382 (2014).
- 46 Zhan, Y. *et al.* Cross-linkable nitrile functionalized graphene oxide/poly (arylene ether nitrile) nanocomposite films with high mechanical strength and thermal stability. *J. Mater. Chem.* **22**, 5602-5608 (2012).
- 47 Forati, T., Atai, M., Rashidi, A. M., Imani, M., Behnamghader, A. Physical and mechanical properties of graphene oxide/polyethersulfone nanocomposites. *Poly. Adv. Tech.* **25**, 322-328 (2014).
- 48 Lee, J. H. *et al.* Graphene oxide nanoplatelets composite membrane with hydrophilic and antifouling properties for wastewater treatment. *J. Membr. Sci.* **448**, 223-230 (2013).
- 49 Ionita, M., Pandele, A. M., Crica, L., Pilan, L. Improving the thermal and mechanical properties of polysulfone by incorporation of graphene oxide. *Compos. Part B: Engg.*, **59**, 133-139 (2014).
